# Supplementary material for: Multi-modality deep learning model reaches high prediction accuracy in the diagnosis of ovarian cancer
Source: PubMed Central journal article supplement — iScience. 2024 Mar 4;27(4):109403. doi: 10.1016/j.isci.2024.109403 (PMC10959660; doi:10.1016/j.isci.2024.109403), 2024-03-04
Supplement: mmc1.pdf [file mmc1.pdf]

iScience, Volume 27

## **Supplemental information**

**Multi-modality deep learning model  
reaches high prediction accuracy in the  
diagnosis of ovarian cancer**

**Zimo Wang, Shuyu Luo, Jing Chen, Yang Jiao, Chen Cui, Siyuan Shi, Yang Yang, Junyi Zhao, Yitao Jiang, Yujuan Zhang, Fanhua Xu, Jinfeng Xu, Qi Lin, and Fajin Dong**

Table S1: Histopathological subtypes of all ovarian tumors, Related to Table 1

| Histological type                         | Number(%)    |
|-------------------------------------------|--------------|
| Serous cystadenoma                        | 248 (23.53%) |
| Mucinous cystadenoma                      | 211 (20.02%) |
| Serous cystadenocarcinoma                 | 156 (14.80%) |
| Endometriotic cyst                        | 112 (10.63%) |
| Mature teratoma                           | 98 (9.30%)   |
| Mucous cystadenocarcinoma                 | 63 (5.98%)   |
| Immature teratoma                         | 33 (3.13%)   |
| Clear cell carcinoma                      | 26 (2.47%)   |
| Borderline serous cystadenoma             | 19 (1.80%)   |
| Ovarian carcinosarcoma                    | 18 (1.71%)   |
| Ovarian fibroma                           | 17 (1.61%)   |
| Endometrioid carcinoma                    | 12 (1.14%)   |
| Borderline mucinous cystadenoma           | 11 (1.04%)   |
| Granulosa cell tumor                      | 10 (0.95%)   |
| Borderline clear cell tumor               | 5 (0.47%)    |
| Granular cell carcinoma                   | 4 (0.38%)    |
| Theca cell tumor                          | 3 (0.28%)    |
| Borderline endometrioid carcinoma         | 3 (0.28%)    |
| Dysgerminoma                              | 3 (0.28%)    |
| Setoli-Leydig cell tumor                  | 1 (0.09%)    |
| Ovarian malignant peritoneal mesothelioma | 1 (0.09%)    |
| Data in parentheses are percentages       |              |
